# Supplementary material
Source: publisher figshare collection journal article supplement (https://diabetesjournals.figshare.com/articles/dataset/_/14096582)
Supplement: Supplementary file 1 [file 2]

**Supplementary Table S1:** Participant characteristics at baseline

|                                            | <b>Total (n=23)</b> | <b>Male (n=13)</b> | <b>Female (n=10)</b> |
|--------------------------------------------|---------------------|--------------------|----------------------|
| <b>Participant Characteristics</b>         |                     |                    |                      |
| Age; mean (range)                          | 62 ± 8              | 60 ± 9             | 64 ± 5               |
| BMI (kg/m <sup>2</sup> )*                  | 32.7 ± 3.5          | 32.5 ± 3.2         | 32.8 ± 3.9           |
| Weight (kg)                                | 94 ± 13.4           | 99.9 ± 13.4        | 86.7 ± 9.4 †         |
| Waist circumference (cm)                   | 111.0 ± 8.9         | 114.6 ± 8.6        | 106.2 ± 6.7 †        |
| Waist to hip ratio                         | 1.0 ± 0.1           | 1.1 ± 0.1          | 0.9 ± 0.1 †          |
| Neck (cm)                                  | 39.7 ± 4.8          | 43.0 ± 4.2         | 36.0 ± 1.9 †         |
| SBP (mmHg)                                 | 128 ± 9             | 125 ± 9            | 131 ± 9 †            |
| DBP (mmHg)                                 | 73 ± 8              | 72 ± 8             | 74 ± 7               |
| T2D duration (yrs)                         | 10 ± 7              | 10 ± 7             | 11 ± 6               |
| <b>Metabolic parameters</b>                |                     |                    |                      |
| Glycated haemoglobin (%)                   | 7.6 ± 0.8           | 7.8 ± 0.7          | 7.3 ± 0.7            |
| Fasting glucose (mmol/L)‡                  | 8.2 ± 1.5           | 8.2 ± 1.7          | 8.1 ± 1.1            |
| Fasting insulin (pmol/L)‡                  | 76.2 ± 43.5         | 81.8 ± 49.1        | 69.0 ± 34.5          |
| Fasting triglycerides (mmol/L)‡            | 1.7 ± 0.6           | 1.8 ± 0.6          | 1.5 ± 0.5 †          |
| HOMA2-IR                                   | 1.9 ± 1.0           | 2.0 ± 1.1          | 1.7 ± 0.9            |
| HOMA-%β                                    | 56.6 ± 31.5         | 61.1 ± 36.8        | 50.8 ± 22.3          |
| <b>Number of diabetes therapies, n (%)</b> |                     |                    |                      |
| Single                                     | 7 (30)              | 2 (15)             | 5 (50)               |
| Dual                                       | 10 (44)             | 6 (46)             | 4 (40)               |
| Triple                                     | 6 (26)              | 5 (38)             | 1 (10)               |

BMI, Body Mass Index; SBP, Systolic Blood Pressure; DBP, Diastolic Blood Pressure; T2D, Type 2 Diabetes; SD, Standard Deviation. Data presented as mean ± SD unless otherwise stated.  
 \*Calculated as body mass in kilograms divided by height in metres squared.  
 †Statistically significant difference; P<0.05, between males and females.  
 ‡Calculated as the mean fasting concentration of two time points (-1 and 0 h) at the beginning of testing days

**Supplementary Table S2:** Overview and comparison of outcomes for total, positive incremental and net incremental area under the curve, and mean analyte values

|                                      | <b>SIT</b>        | <b>SRA3</b>       | <b>SRA6</b>         |
|--------------------------------------|-------------------|-------------------|---------------------|
| <b>tAUC</b>                          |                   |                   |                     |
| Glucose mmol·h·L <sup>-1</sup> *     | 84.9 (80.3, 89.8) | 85.4 (80.7, 90.3) | 80.7 (76.3, 85.3)†  |
| Insulin pmol·h·L <sup>-1</sup> *     | 1982 (1679, 2340) | 1870 (1584, 2207) | 1783 (1510, 2105)†  |
| Triglycerides mmol·h·L <sup>-1</sup> | 16.7 (15.7, 17.6) | 17.1 (16.1, 18.0) | 16.7 (15.7, 17.6)   |
| <b>Positive iAUC</b>                 |                   |                   |                     |
| Glucose mmol·h·L <sup>-1</sup> *     | 19.7 (15.6, 24.7) | 20.3 (16.2, 25.6) | 15.4 (12.3, 19.4)†‡ |
| Insulin pmol·h·L <sup>-1</sup> *     | 1414 (1117, 1790) | 1306 (1032, 1653) | 1233 (974, 1560)†   |
| Triglycerides mmol·h·L <sup>-1</sup> | 3.2 (2.3, 4.2)    | 3.5 (2.6, 4.4)    | 3.1 (2.2, 4.0)      |
| <b>Net iAUC</b>                      |                   |                   |                     |
| Glucose mmol·h·L <sup>-1</sup>       | 21.4 (16.9, 25.8) | 22.1 (17.7, 26.6) | 17.0 (12.5, 21.4)†‡ |
| Insulin pmol·h·L <sup>-1</sup> *     | 1411 (1128, 1767) | 1301 (1040, 1629) | 1229 (982, 1538)†   |
| Triglycerides mmol·h·L <sup>-1</sup> | 3.0 (2.1, 3.9)    | 3.4 (2.5, 4.3)    | 3.0 (2.1, 3.9)      |
| <b>Mean Analyte Values</b>           |                   |                   |                     |
| Glucose mmol·L <sup>-1</sup>         | 10.9 (10.3, 11.5) | 11.0 (10.4, 11.6) | 10.3 (9.7, 11.0)†‡  |
| Insulin pmol·L <sup>-1</sup>         | 300 (260, 341)    | 286 (246, 327)    | 265 (224, 306)      |
| Triglycerides mmol·L <sup>-1</sup>   | 2.1 (2.0, 2.2)    | 2.1 (2.0, 2.2)    | 2.1 (1.9, 2.2)      |

Data are presented as mean (95% CI) \*Data is displayed as exponents of the natural log. †SRA6 significantly different to SIT ( $P < 0.05$ ). ‡SRA6 significantly different to SRA3 ( $P < 0.05$ ). Mean analyte values are presented as the average of 16 measurements taken across each 8 h trial day.

**Supplementary Table S3:** Meal-specific 3.5 h net incremental area under the curve values

|                                          | <b>SIT</b>       | <b>SRA3</b>      | <b>SRA6</b>       |
|------------------------------------------|------------------|------------------|-------------------|
| <b>Post-breakfast iAUC<sub>net</sub></b> |                  |                  |                   |
| Glucose mmol·h·L <sup>-1</sup>           | 11.2 (9.0, 13.4) | 11.6 (9.4, 13.8) | 9.6 (7.4, 11.8)‡  |
| Insulin pmol·h·L <sup>-1</sup> *         | 616 (475, 799)   | 632 (487, 819)   | 596 (460, 773)    |
| Triglycerides mmol·h·L <sup>-1</sup>     | 0.4 (0.2, 0.6)   | 0.4 (0.2, 0.6)   | 0.5 (0.3, 0.7)    |
| <b>Post-lunch iAUC<sub>net</sub></b>     |                  |                  |                   |
| Glucose mmol·h·L <sup>-1</sup>           | 12.0 (7.1, 16.8) | 12.5 (7.7, 17.3) | 7.8 (2.9, 12.6)†‡ |
| Insulin pmol·h·L <sup>-1</sup> *         | 958 (707, 1300)  | 796 (587, 1080)† | 796 (587, 1079)‡  |
| Triglycerides mmol·h·L <sup>-1</sup>     | 3.0 (2.1, 4.0)   | 3.4 (2.5, 4.4)   | 3.0 (2.0, 4.0)    |

Data are presented as mean (95% CI) \*Data are displayed as exponents of the natural log.

†Significantly different to SIT ( $P < 0.05$ ). ‡SRA6 significantly different to SRA3 ( $P < 0.05$ )

**Supplementary Table S4:** Type and combinations medications used by participants

| <b>Medication</b>                                 | <b>n (%) of the 23 participants</b> |
|---------------------------------------------------|-------------------------------------|
| Metformin                                         | 21 (91)                             |
| DPP4                                              | 7 (30)                              |
| Sulfonylureas                                     | 5 (22)                              |
| SGLT2 <sup>+</sup>                                | 8 (35)                              |
| GLP agonists                                      | 4 (17)                              |
| <b>Combinations; n (%)</b>                        |                                     |
| <i>Single; 7 (30)</i>                             |                                     |
| Metformin only                                    | 6 (26)                              |
| Sulfonylurea only                                 | 1 (4)                               |
| <i>Dual; 10 (44)</i>                              |                                     |
| Metformin + DPP4                                  | 2 (9)                               |
| Metformin + Sulfonylurea                          | 2 (9)                               |
| Metformin + SGLT2 <sup>+</sup>                    | 2 (9)                               |
| Metformin + GLP agonist                           | 2 (9)                               |
| DPP4 + SGLT <sup>+</sup>                          | 1 (4)                               |
| <i>Triple; 6 (26)</i>                             |                                     |
| Metformin + DPP4 + SGLT2 <sup>+</sup>             | 2 (9)                               |
| Metformin + SGLT2 <sup>+</sup> + GLP agonist      | 2 (9)                               |
| Metformin + DPP4 + Sulfonylurea                   | 1 (4)                               |
| Metformin + Sulfonylurea + SGLT2 <sup>+</sup>     | 1 (4)                               |
| <b>Other treatment related medications, n (%)</b> |                                     |
| ACE inhibitor or ARB                              | 12 (52)                             |
| Calcium channel blocker                           | 3 (13)                              |
| Beta blocker                                      | 3 (13)                              |
| Diuretic and other                                | 2 (9)                               |
| Statin                                            | 14 (61)                             |

**Supplementary Table S5:** Total time (mins) spent sitting, standing and stepping from ActivPAL inclinometer during each experimental condition

| <b>During condition</b> | <b>SIT</b> | <b>SRA3</b> | <b>SRA6</b> |
|-------------------------|------------|-------------|-------------|
| Sitting time            | 459 ± 21   | 424 ± 16*   | 421 ± 34*   |
| Standing time           | 11 ± 15    | 29 ± 11*    | 34 ± 28*    |
| Stepping time           | 3 ± 7      | 19 ± 9*     | 21 ± 12*    |

All data expressed as means ± SD. \*Denotes a statistically significant difference from SIT ( $P < 0.001$ )

**Supplementary Table S6:** Glucose, Insulin and Triglyceride iAUC<sub>net</sub> results with additional adjustment for activity data

|                                                                             | <b>SIT</b>        | <b>SRA3</b>       | <b>SRA6</b>        |
|-----------------------------------------------------------------------------|-------------------|-------------------|--------------------|
| <i>Base Model</i> <sup>†</sup>                                              |                   |                   |                    |
| Glucose mmol·h·L <sup>-1</sup>                                              | 21.4 (16.9, 25.8) | 22.1 (17.7, 26.6) | 17.0 (12.5, 21.4)* |
| Insulin pmol·h·L <sup>-1</sup>                                              | 1411 (1128, 1767) | 1301 (1040, 1629) | 1229 (982, 1538)*  |
| Triglycerides mmol·h·L <sup>-1</sup>                                        | 3.0 (2.1, 3.9)    | 3.4 (2.5, 4.3)    | 3.0 (2.1, 3.9)     |
| <i>Adjusted for pre-experimental stepping time</i>                          |                   |                   |                    |
| Glucose mmol·h·L <sup>-1</sup>                                              | 20 (16, 24)       | 20 (16, 24)       | 15 (11, 19)        |
| Insulin pmol·h·L <sup>-1</sup>                                              | 1281 (944, 1547)  | 1208 (944, 1547)  | 1137 (888, 1456)   |
| Triglycerides mmol·h·L <sup>-1</sup>                                        | 3.2 (2.3, 4.2)    | 3.7 (2.7, 4.7)    | 3.0 (2.0, 3.9)     |
| <i>Adjusted for restricted period stepping time</i>                         |                   |                   |                    |
| Glucose mmol·h·L <sup>-1</sup>                                              | 23 (18, 27)       | 22 (17, 26)       | 17 (13, 21)*       |
| Insulin pmol·h·L <sup>-1</sup>                                              | 1307 (1126, 1517) | 1218 (1046, 1420) | 1215 (1047, 1409)  |
| Triglycerides mmol·h·L <sup>-1</sup>                                        | 3.3 (2.3, 4.2)    | 3.0 (2.0, 4.0)    | 2.9 (1.9, 3.8)     |
| <i>Adjusted for pre-experimental MVPA (ActivPAL derived)</i> <sup>‡</sup>   |                   |                   |                    |
| Glucose mmol·h·L <sup>-1</sup>                                              | 22 (17, 27)       | 22 (17, 27)       | 17 (12, 22)        |
| Insulin pmol·h·L <sup>-1</sup>                                              | 1265 (1084, 1476) | 1258 (1073, 1475) | 1216 (1050, 1408)  |
| Triglycerides mmol·h·L <sup>-1</sup>                                        | 3.1 (2.0, 4.1)    | 3.2 (2.1, 4.3)    | 2.8 (1.8, 3.9)     |
| <i>Adjusted for restricted period MVPA (ActivPAL derived)</i> <sup>‡</sup>  |                   |                   |                    |
| Glucose mmol·h·L <sup>-1</sup>                                              | 23 (19, 27)       | 22 (17, 26)       | 17 (13, 21)*       |
| Insulin pmol·h·L <sup>-1</sup>                                              | 1265 (1084, 1476) | 1258 (1073, 1475) | 1216 (1050, 1408)  |
| Triglycerides mmol·h·L <sup>-1</sup>                                        | 3.1 (2.0, 4.1)    | 3.2 (2.1, 4.3)    | 2.8 (1.8, 3.9)     |
| <i>Adjusted for pre-experimental MVPA (Actigraph derived)</i> <sup>§</sup>  |                   |                   |                    |
| Glucose mmol·h·L <sup>-1</sup>                                              | 21 (17, 26)       | 23 (18, 27)       | 17 (13, 22)        |
| Insulin pmol·h·L <sup>-1</sup>                                              | 1463 (1141, 1876) | 1377 (1074, 1766) | 1293 (1009, 1659)* |
| Triglycerides mmol·h·L <sup>-1</sup>                                        | 3.1 (2.1, 4.0)    | 3.5 (2.5, 4.5)    | 3.0 (2.1, 4.0)     |
| <i>Adjusted for restricted period MVPA (Actigraph derived)</i> <sup>§</sup> |                   |                   |                    |
| Glucose mmol·h·L <sup>-1</sup>                                              | 24 (19, 30)       | 22 (17, 26)       | 15 (10, 20)*       |
| Insulin pmol·h·L <sup>-1</sup>                                              | 1478 (1222, 1786) | 1274 (1094, 1482) | 1340 (1111, 1616)  |
| Triglycerides mmol·h·L <sup>-1</sup>                                        | 2.9 (1.8, 3.9)    | 3.0 (2.2, 3.9)    | 2.9 (1.9, 4.0)     |

Data are means (95% Confidence Interval). \*Denotes a statistically significant difference from SIT ( $P < 0.05$ ). <sup>†</sup>Base model adjusted for treatment order, average of the -1 and 0 h fasting samples, age, sex and waist circumference. <sup>‡</sup>ActivPAL derived MVPA was calculated as time spent stepping at a cadence of >100steps/min. <sup>§</sup>Wrist-worn Actigraph data were analysed using the GGIR package and time spent in MVPA was identified using Hildebrand Euclidean Norm Minus One (ENMO) cutpoints of 100.6 for moderate and 428.8mg for vigorous physical activity.
